## Software for Systematics and Evolution

18 August 2021

# KoT: an automatic implementation of the $K/\theta$ method for species delimitation

YANN SPÖRI<sup>1,2</sup>, FABIO STOCH<sup>1</sup>, SIMON DELLICOUR<sup>3,4</sup>, C. WILLIAM BIRKY, JR.<sup>5</sup>  
AND JEAN-FRANÇOIS FLOT,<sup>1,2</sup>

<sup>1</sup>*Evolutionary Biology & Ecology, Université libre de Bruxelles (ULB), Brussels, Belgium*

<sup>2</sup>*Interuniversity Institute of Bioinformatics in Brussels – (IB)<sup>2</sup>, Brussels, Belgium*

<sup>3</sup>*Spatial Epidemiology Lab (SpELL), Université libre de Bruxelles (ULB), Brussels, Belgium*

<sup>4</sup>*Department of Microbiology, Immunology and Transplantation, Rega Institute, Laboratory for Clinical and Epidemiological Virology, KU Leuven, University of Leuven, Leuven, Belgium*

<sup>5</sup>*Department of Ecology and Evolutionary Biology, The University of Arizona, Tucson, Arizona, USA*

*Corresponding authors: [yspori@ulb.ac.be](mailto:yspori@ulb.ac.be), [birky@arizona.edu](mailto:birky@arizona.edu), [jflot@ulb.ac.be](mailto:jflot@ulb.ac.be)*

### ABSTRACT

<sup>1</sup>  $K/\theta$  is a method to delineate species that rests on the calculation of the ratio between the  
<sup>2</sup> average distance  $K$  separating two putative species-level clades and the genetic diversity  
<sup>3</sup>  $\theta$  of these clades. Although this method is explicitly rooted in population genetic theory,  
<sup>4</sup> it was never benchmarked due to the absence of a program allowing automated analyses.  
<sup>5</sup> For the same reason, its application by hand was limited to small datasets of a few tens of  
<sup>6</sup> sequences.

<sup>7</sup> We present an automatic implementation of the  $K/\theta$  method, dubbed KoT (short for “K  
<sup>8</sup> over Theta”), that takes as input a FASTA file, builds a neighbour-joining tree, and returns  
<sup>9</sup> putative species boundaries based on a user-specified  $K/\theta$  threshold. This automatic imple-  
<sup>10</sup> mentation avoids errors and makes it possible to apply the method to datasets comprising  
<sup>11</sup> many sequences, as well as to test easily the impact of choosing different  $K/\theta$  threshold  
<sup>12</sup> ratios. KoT is implemented in Haxe, with a javascript webserver interface freely available at  
<sup>13</sup> <https://eeg-ebe.github.io/KoT/>

14 *Key words:* 4X rule,  $K/\theta$ , species delimitation, molecular systematics, DNA taxonomy

15

## 16 INTRODUCTION

17 Methods to delineate species from sets of DNA sequences have been an intense field of  
18 research for the last 20 years (Sites and Marshall, 2003; Flot, 2015). Some methods delimit  
19 species based on phylogenetic trees, other on genetic distances, and yet others on allele  
20 sharing (Fontaneto et al., 2015). Among these methods, one called  $K/\theta$  (Birky et al., 2010;  
21 Birky, 2013; Birky and Maughan, 2020) stands out be resting on the genealogical species  
22 concept, in which closely related populations are considered as distinct species when their  
23 lineages for a given locus (or set of loci) are reciprocally monophyletic, that is, “if their  
24 loci coalesce more recently within the group than between any member of the group and  
25 any organisms outside the group” (Baum and Shaw, 1995). Of course, sampling all lineages  
26 from a population is usually impossible, but population genetic theory provides ways to  
27 calculate the probability that the lineages of two populations are monophyletic given the  
28 observation that the sequences samples from these populations form clades in a phylogenetic  
29 tree (Hudson and Coyne, 2002).

30 In particular, Rosenberg (2003) provides a formula that uses Watterson’s estimator  
31 of genetic diversity  $\theta = 4N_e\mu$  (Watterson, 1975) of each of two clades of sequences, the  
32 number of sequences in each of them, and the mean pairwise sequence difference between  
33 the two clades  $K$  to calculate the probability that the corresponding two populations are  
34 reciprocally monophyletic, i.e. distinct species according to the genealogical species concept.  
35 This formula is complex, but when the two  $\theta$  values are similar and the number of sequences  
36 in each clade is higher than three, a useful rule of thumb is that pairs of clades with a  $K/\theta$   
37 ratio higher than 4 have a probability of at least 0.95 of belonging to different species. This  
38 forms the basis of the so-called “4X rule” (Birky and Barraclough, 2009), which has been

39 widely used to delineate species in a variety of organisms. However, one may wish to choose  
40 a more stringent threshold: for instance, a  $K/\theta$  ratio higher than 6 entails a probability of  
41 monophyly higher than 0.99 (according to equation 9 in Rosenberg, 2003).

42 Despite the theoretical appeal of this method based on an explicit criterion inspired  
43 by population genetic, its practical application has been hampered by the lack of a program  
44 performing the needed calculations automatically. To fill this gap, we introduce here KoT  
45 (short for “K over Theta”), an automatic implementation of the  $K/\theta$  method using the  
46 programming language Haxe (Dasnois, 2011).

## 47 DESCRIPTION

48 KoT takes as input an alignment of DNA sequences in the FASTA file format. Users  
49 can specify the  $K/\theta$  threshold they wish to use to delineate species (by default, 4).

50 KoT starts by calculating all the pairwise nucleotide distances among the sequences  
51 in the dataset. In case the input contains indels and/or missing data (encoded respectively as  
52 “-” and as “N” or “?”), users can either ask KoT to filter out completely the corresponding  
53 positions in the alignment (“complete deletion” mode) or to retain them (“pairwise deletion”  
54 mode, in which case positions with missing or ambiguous data are ignored during pairwise  
55 comparisons). From this set of pairwise distances, KoT then computes a neighbor-joining  
56 (NJ) tree and the  $K/\theta$  ratios of each pair of sister clades using the procedure outlined in  
57 Birky and Maughan (2020).

58 To compute the genetic diversity  $\theta$  of each clade, KoT starts by calculating the  
59 nucleotide diversity  $\pi$  (Nei and Li, 1979) as the mean of all nucleotide-level differences  $\pi_{ij}$   
60 (number of nucleotide differences per nucleotide site between sequences  $i$  and  $j$ ) among the  
61  $\frac{n(n-1)}{2}$  pairs of sequences in a clade of  $n$  sequences, i.e.  $\pi = \frac{2}{n(n-1)} \sum_{i=1}^n \sum_{j=1}^{i-1} \pi_{ij}$  (Equation  
62 10.6 in Nei, 1987). An equivalent way to calculate  $\pi$  found in the literature is to compare all  
63 pairs of haplotypes instead of all pairs of sequences: in that case, the formula above becomes  
64  $\pi = \frac{1}{n(n-1)} \sum_{ij} (n \times x_i)(n \times x_j) \pi_{ij}$  (where  $x_i$  is the frequency of haplotype  $i$  in the clade),

65 which simplifies into  $\pi = \frac{n}{n-1} \sum_{ij} x_i x_j \pi_{ij}$  (Equation 10.6 in Nei, 1987), i.e. the average  
66 heterozygosity multiplied by a sample size correction  $n/(n-1)$  (Nei and Tajima, 1981;  
67 Korunes and Samuk, 2021). As KoT uses the direct formula comparing pairs of sequences,  
68 however, no sample size correction is needed.

69 For clades made up of identical sequences (in which case  $\pi = 0$ ), an upper bound of  $\pi$   
70 is sought by assuming that one sequence differs from the others by a single mutation, i.e. by  
71 replacing one of the  $\frac{n(n-1)}{2}$  pairwise distances with  $1/L$ , where  $L$  is the sequence length; in  
72 such case  $\pi$  become  $\frac{2}{Ln(n-1)}$  (Birky et al., 2010). As this ratio is not defined for  $n = 1$ , KoT  
73 uses  $n = 2$  (i.e.  $\pi = 1/L$ ) for clades comprising a single sequence. To estimate the genetic  
74 diversity  $\theta$  associated with a specific clade, KoT uses the formula  $\theta = \frac{1}{\frac{1}{\pi} - \frac{4}{3}}$  (Equation 9 in  
75 Tajima, 1996), which corrects for multiple hits based on the Jukes-Cantor model of sequence  
76 evolution (Jukes and Cantor, 1969).

77 To compute the genetic divergence  $K$  between sister clades A and B, KoT computes  
78 the mean pairwise nucleotide distance  $p = \sum_{i=1}^{n_A} \sum_{j=1}^{n_B} \pi_{ij}$  between the sequences in the  
79 two clades, where  $n_A$  stands for the number of individuals in clade A and  $n_B$  stands for  
80 the number of individuals in clade B, then corrects it for multiple substitutions using the  
81 Jukes-Cantor formula  $K = -\frac{3}{4} \ln(1 - \frac{4}{3}p)$  (Jukes and Cantor, 1969). Using the Jukes-Cantor  
82 correction for calculating  $K$  is important to ensure that both terms of the ratio  $K/\theta$  are  
83 computed using the same evolutionary model.

84 Finally, KoT computes the  $K/\theta$  ratios of clades A and B and compares the smallest  
85 of the two with the threshold chosen by the user to delineate species. These calculations  
86 are performed iteratively from the leaves of the tree all the way to its root. When a ladder  
87 structure ((A,B)C) or a polytomy (A,B,C) is encountered, KoT starts by comparing the two  
88 clades separated by the smallest distance  $K$ , i.e. A and B: if the result of the calculation  
89 does not support the hypothesis that A and B are different species, the A+B clade is then  
90 compared to C to find out whether they are conspecific or heterospecific; whereas if the result  
91 of the calculation indicates that A and B are likely two distinct species, C is compared with

92 whichever of A and B has the smaller average distance  $K$  to C (Birky et al., 2010). If C is  
93 then deemed to be distinct as well, the final result returned is three species A, B and C.  
94 On the other hand, if the result of the calculation suggests that C is conspecific with e.g. B,  
95 an additional comparison of C with A is warranted to ensure the transitivity of the result  
96 (Dellicour and Flot, 2018). As the extra calculations this entails can take lots of time in  
97 complex cases, this comparison is only performed if the box “transitivity” is checked by the  
98 user prior to running the analysis. If the “transitivity” box is not checked (as by default),  
99 KoT simply returns in such cases two species A and B+C; when the “transitivity” box is  
100 checked, by contrast, KoT checks whether the  $K/\theta$  ratio for the C vs. A comparison is also  
101 above the user-selected threshold: if so, the final delimitation returned is a pair of species A  
102 and B+C; whereas if the calculation does not support the monophyly of A vs. C, the final  
103 result returned is a single species A+B+C.

104 KoT outputs a tree in which the  $\theta$  values of each pair of clades being compared are  
105 displayed on the tree next to the node uniting them, together with their  $K$  distance and  
106 the  $K/\theta$  ratio (obtained using the larger of the two  $\theta$  values). Colors are applied to the tree  
107 in order to visually delineate the different species. A partition list, i.e. a two-column table  
108 indicating, for each sequence in the input FASTA, the species to which it was attributed  
109 (Spöri and Flot, 2020), is also outputted below the tree where it can be easily copied/pasted  
110 into other applications.

## 111 BIOLOGICAL EXAMPLE

112 To investigate the behavior of KoT, we reanalyzed the COI dataset from one recent  
113 article (Stoch et al., 2020). In this article, a dataset of 34 COI sequences of specimens  
114 of the *Niphargus tatrensis* species complex was analyzed using a diversity of approaches:  
115 mPTP Kapli et al. (2017) delimited seven putative species, ABGD (Puillandre et al., 2012)  
116 returned ten of them, and bPTP (Zhang et al., 2013) and ST-GMYC (Pons et al., 2006)  
117 delineated eleven species-level units. The methods chiefly differed in their delimitation of

118 species among the non-Austrian specimens included in the study but were largely congruent  
119 in their treatment of the Austrian specimens, with mPTP, bPTP and ST-GMYC finding  
120 four species and ABGD delimiting five species in Austria.

121 When run with a  $K/\theta$  threshold ratio of 4 (Figure 1), KoT returned twelve species,  
122 including five for Austria (separated by  $K/\theta$  ratios of 21.39, 17.50, 4.52 and 5.98); with  
123 a  $K/\theta$  threshold ratio of 5 (Figure 2), the method returned eleven species, with precisely  
124 the same putative boundaries as those obtained using bPTP and ST-GMYC (including  
125 four species for Austria separated by  $K/\theta$  ratios of 21.35, 17.44 and 5.94); finally, with a  
126  $K/\theta$  threshold ratio of 6 (Figure 3) KoT returned eight species-level units, notably lumping  
127 together all Austrian specimens into a single putative species. This highlights the sensitivity  
128 of this method to the  $K/\theta$  threshold parameter.

129 AVAILABILITY

130 KoT is written in Haxe. Its source code is available at <https://github.com/eeg-ebe/>  
131 KoT, and a javascript webserver is freely accessible at <https://eeg-ebe.github.io/KoT/>.

132 REFERENCES

- 133 Baum, D. A. and K. L. Shaw. 1995. Genealogical perspectives on the species problem.  
134 *in* Experimental and molecular approaches to plant systematics (P. C. Hoch and A. G.  
135 Stevenson, eds.) no. 53 in Monographs in systematics. Missouri Botanical Garden, St.  
136 Louis.
- 137 Birky, C. W. 2013. Species detection and identification in sexual organisms using population  
138 genetic theory and DNA sequences. PLoS ONE 8:e52544.
- 139 Birky, C. W., J. Adams, M. Gemmel, and J. Perry. 2010. Using population genetic theory  
140 and DNA sequences for species detection and identification in asexual organisms. PLoS  
141 ONE 5:e10609.

- 142 Birky, C. W. and H. Maughan. 2020. Evolutionary genetic species detected in prokaryotes  
143 by applying the  $K/\vartheta$  ratio to DNA sequences. preprint bioRxiv.
- 144 Birky, W. C. and T. G. Barraclough. 2009. Asexual speciation. Pages 201–216 *in* Lost Sex  
145 (I. Schön, K. Martens, and P. Dijk, eds.). Springer Netherlands, Dordrecht.
- 146 Dasnois, B. 2011. HaXe 2 Beginner’s Guide. Packt Publishing Ltd.
- 147 Dellicour, S. and J.-F. Flot. 2018. The hitchhiker’s guide to single-locus species delimitation.  
148 *Molecular Ecology Resources* 18:1234–1246.
- 149 Flot, J.-F. 2015. Species delimitation’s coming of age. *Systematic Biology* 64:897–899.
- 150 Fontaneto, D., J.-F. Flot, and C. Q. Tang. 2015. Guidelines for DNA taxonomy, with a focus  
151 on the meiofauna. *Marine Biodiversity* 45:433–451.
- 152 Hudson, R. R. and J. A. Coyne. 2002. Mathematical consequences of the genealogical species  
153 concept. *Evolution* 56:1557–1565.
- 154 Jukes, T. H. and C. R. Cantor. 1969. Evolution of protein molecules. Pages 21–132 *in*  
155 *Mammalian protein metabolism* (H. N. Munro, ed.) vol. 3. Academic Press, New York.
- 156 Kapli, P., S. Lutteropp, J. Zhang, K. Kobert, P. Pavlidis, A. Stamatakis, and T. Flouri. 2017.  
157 Multi-rate Poisson tree processes for single-locus species delimitation under maximum  
158 likelihood and Markov chain Monte Carlo. *Bioinformatics* 33:1630–1638.
- 159 Korunes, K. L. and K. Samuk. 2021. pixy: Unbiased estimation of nucleotide diversity and  
160 divergence in the presence of missing data. *Molecular Ecology Resources* 21:1359–1368.
- 161 Nei, M. 1987. *Molecular evolutionary genetics*. Columbia University Press, New York.
- 162 Nei, M. and W. H. Li. 1979. Mathematical model for studying genetic variation in terms of  
163 restriction endonucleases. *Proceedings of the National Academy of Sciences* 76:5269–5273.
- 164 Nei, M. and F. Tajima. 1981. DNA polymorphism detectable by restriction endonucleases.  
165 *Genetics* 97:145–163.

- 166 Pons, J., T. G. Barraclough, J. Gomez-Zurita, A. Cardoso, D. P. Duran, S. Hazell,  
167 S. Kamoun, W. D. Sumlin, and A. Vogler. 2006. Sequence-based species delimitation  
168 for the DNA taxonomy of undescribed insects. *Systematic Biology* 55:595–609.
- 169 Puillandre, N., A. Lambert, S. Brouillet, and G. Achaz. 2012. ABGD, Automatic Barcode  
170 Gap Discovery for primary species delimitation. *Molecular Ecology* 21:1864–1877.
- 171 Rosenberg, N. A. 2003. The shapes of neutral gene genealogies in two species: probabilities  
172 of monophyly, paraphyly, and polyphyly in a coalescent model. *Evolution* 57:1465–1477.
- 173 Sites, J. W. and J. C. Marshall. 2003. Delimiting species: a Renaissance issue in systematic  
174 biology. *Trends in Ecology & Evolution* 18:462–470.
- 175 Spöri, Y. and J.-F. Flot. 2020. HaplowebMaker and CoMa: two web tools to delimit species  
176 using haplowebs and conspecificity matrices. *Methods in Ecology and Evolution* 11:1434–  
177 1438.
- 178 Stoch, F., E. Christian, and J.-F. Flot. 2020. Molecular taxonomy, phylogeny and biogeog-  
179 raphy of the *Niphargus tatrensis* species complex (Amphipoda, Niphargidae) in Austria.  
180 *Organisms Diversity & Evolution* 20:701–722.
- 181 Tajima, F. 1996. The amount of DNA polymorphism maintained in a finite population when  
182 the neutral mutation rate varies among sites. *Genetics* 143:1457–1465.
- 183 Watterson, G. A. 1975. On the number of segregating sites in genetical models without  
184 recombination. *Theoretical Population Biology* 7:256–276.
- 185 Zhang, J., P. Kapli, P. Pavlidis, and A. Stamatakis. 2013. A general species delimitation  
186 method with applications to phylogenetic placements. *Bioinformatics* 29:2869–2876.



REFERENCES

9

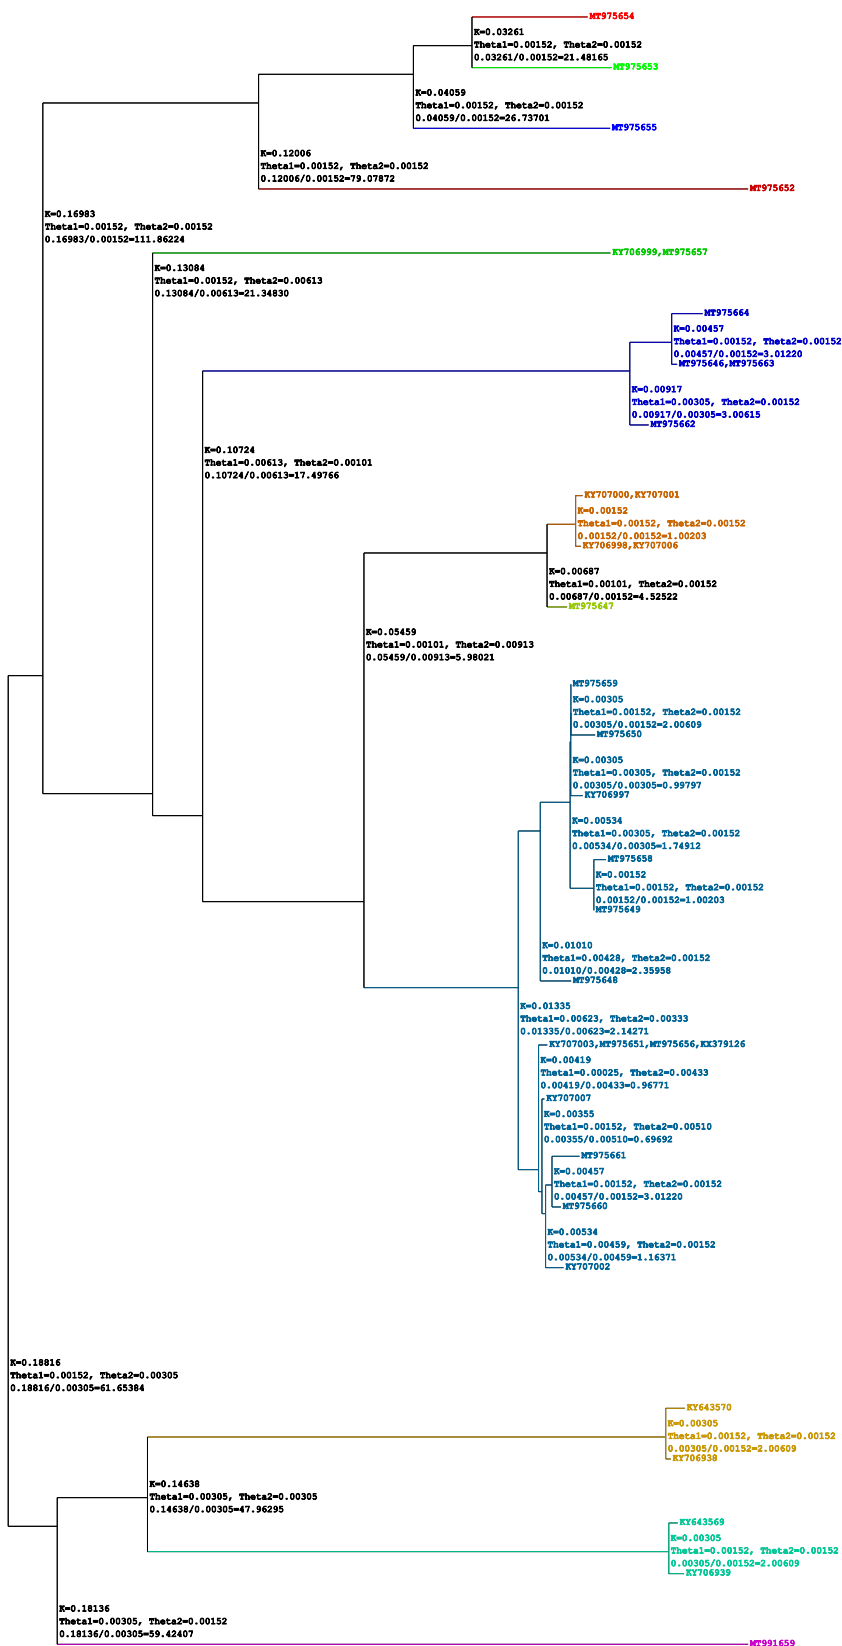

Fig. 1. Output of KoT when run on the COI dataset of Stoch et al. (2020) with a  $K/\theta$  threshold of 4

REFERENCES

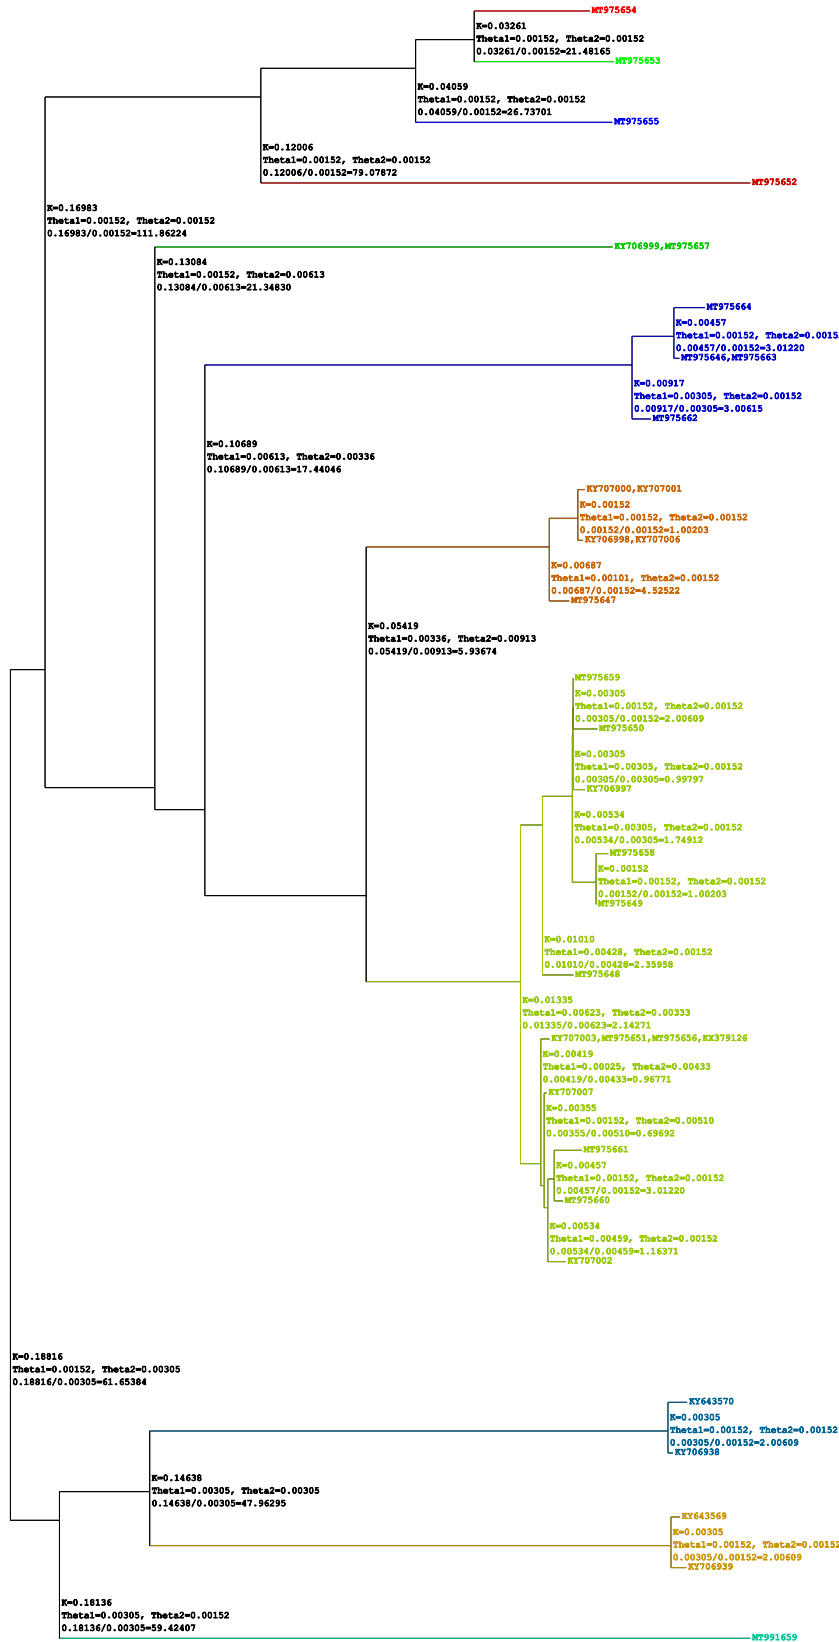

Fig. 2. Output of KoT when run on the COI dataset of Stoch et al. (2020) with a  $K/\theta$  threshold of 5

REFERENCES

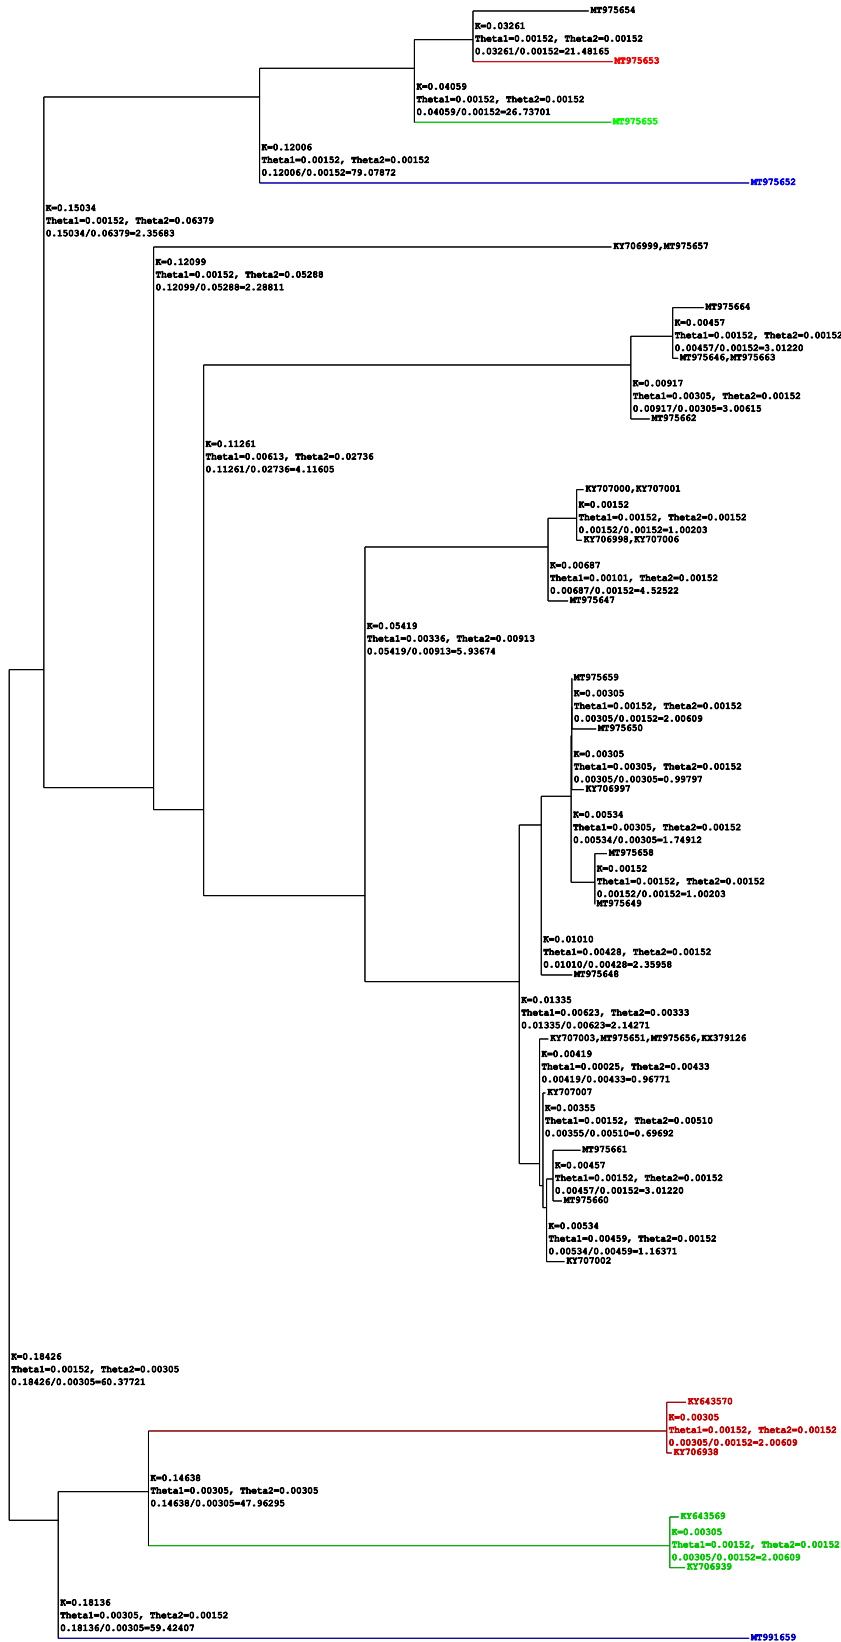

Fig. 3. Output of KoT when run on the COI dataset of Stoch et al. (2020) with a  $K/\theta$  threshold of 6
